# Supplementary material for: Single-cell spatial landscapes of the lung tumour immune microenvironment
Source: PubMed Central journal article supplement (PMC9931585; doi:10.1038/s41586-022-05672-3), 2023-02-01
Supplement: 41586_2022_5672_MOESM1_ESM.pdf [file 41586_2022_5672_MOESM1_ESM.pdf]

**Supplementary information**

---

**Single-cell spatial landscapes of the lung tumour immune microenvironment**

---

In the format provided by the authors and unedited

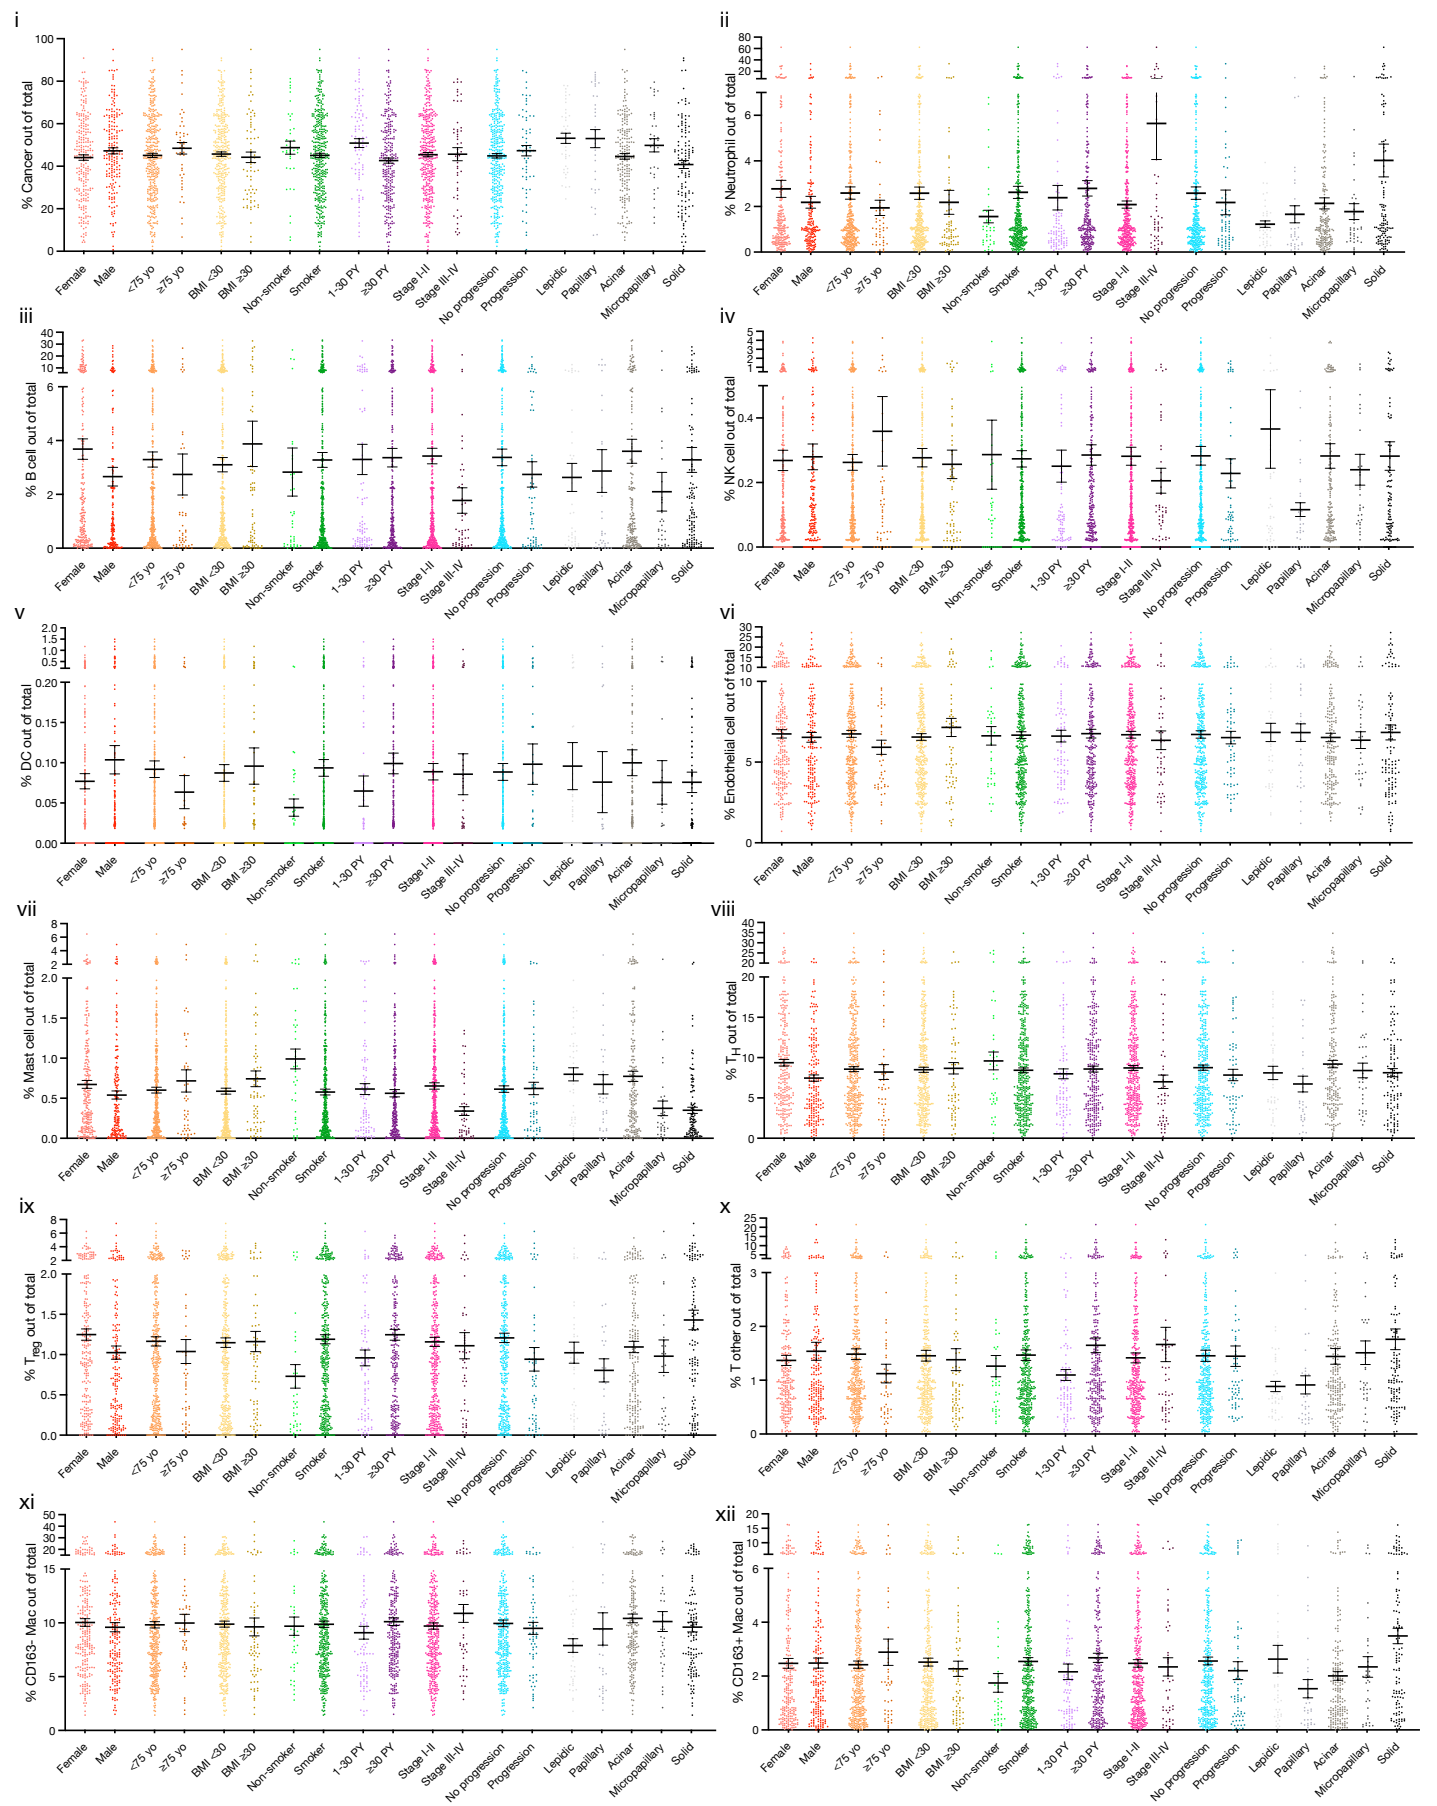

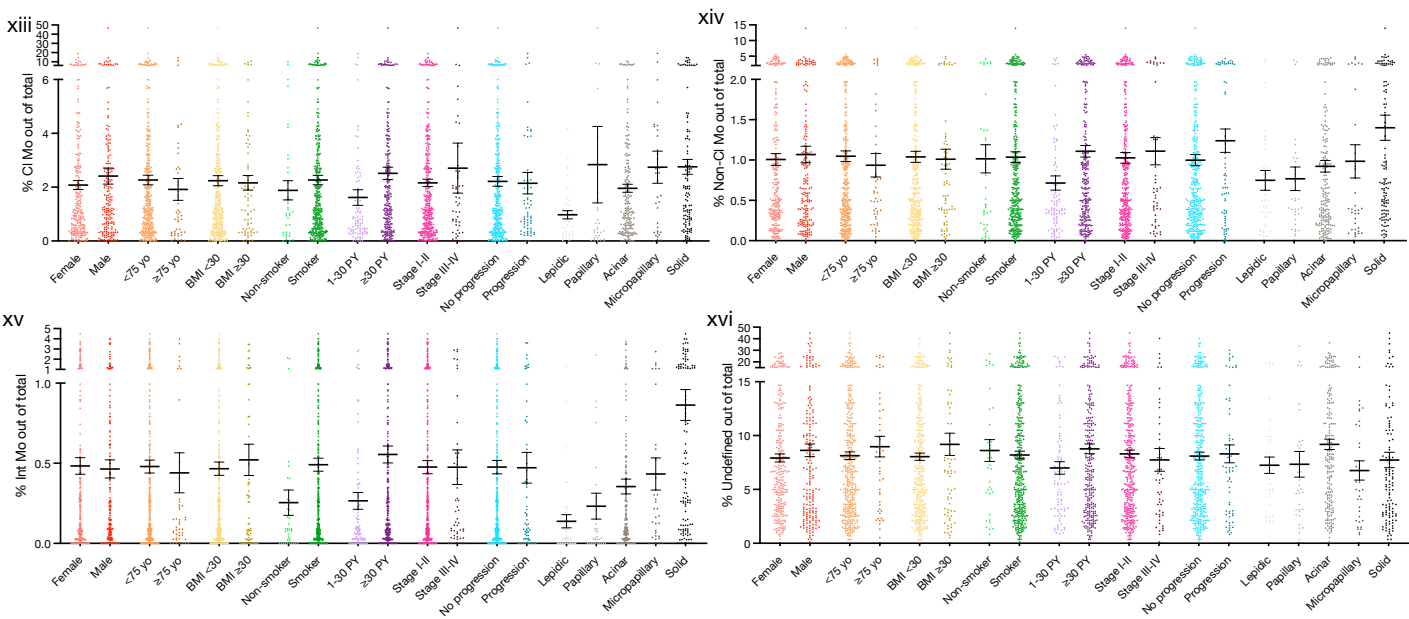

**Supplementary Fig. 1: Single cell prevalence across clinical variables.** Prevalence of cancer cells, neutrophils, B cells, NK cells, DC cells, endothelial cells, mast cells,  $T_H$ ,  $T_{reg}$ , T other, M1-like Mac, M2-like Mac, CI Mo, Int Mo, Non-CI Mo and undefined cells across sex (Female  $n = 233$ , Male  $n = 183$ ), age (<75 yo  $n = 369$ , ≥75 yo  $n = 47$ ), BMI (<30  $n = 346$ , ≥30  $n = 70$ ), smoking status (Smoker  $n = 376$ , Non-smoker  $n = 38$ ), pack-years (1-30  $n = 89$ , ≥30  $n = 256$ ), stage (I-II  $n = 365$ , III-IV  $n = 50$ ), progression status (Progression  $n = 64$ , No progression  $n = 340$ ), and histological subgroup (Lepidic  $n = 40$ , Papillary  $n = 33$ , Acinar  $n = 190$ , Micropapillary  $n = 35$ , Solid  $n = 118$ ). For exact P values, see Supplementary Table 4. Mean  $\pm$  SEM.

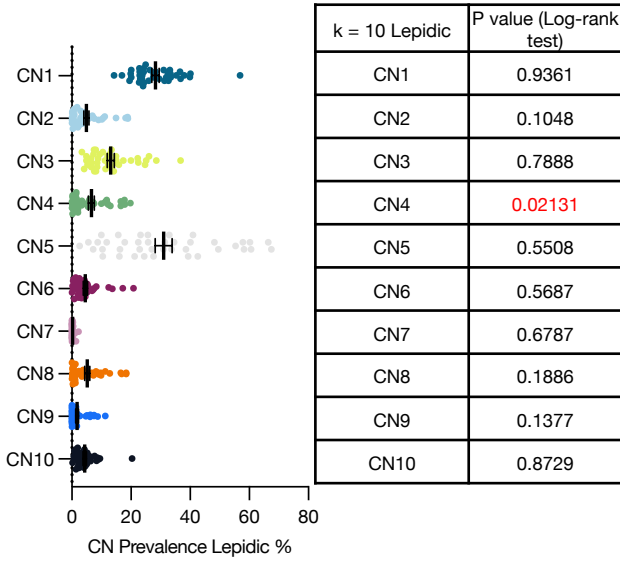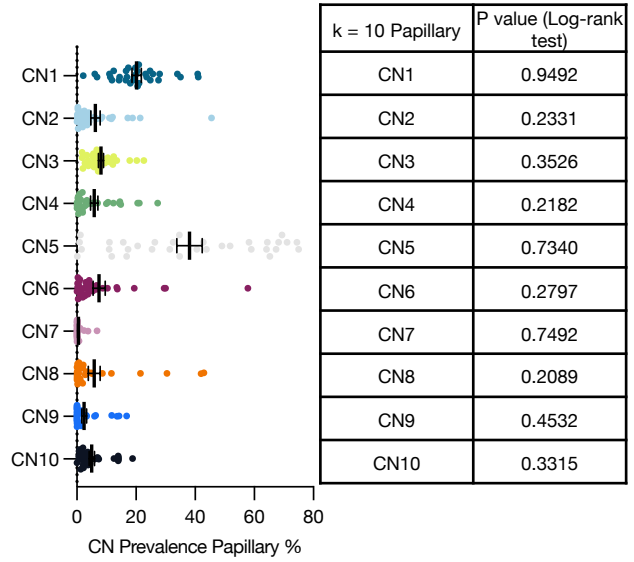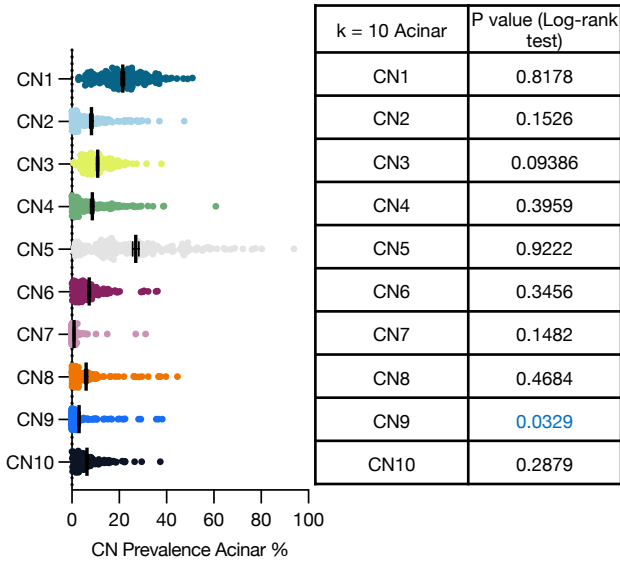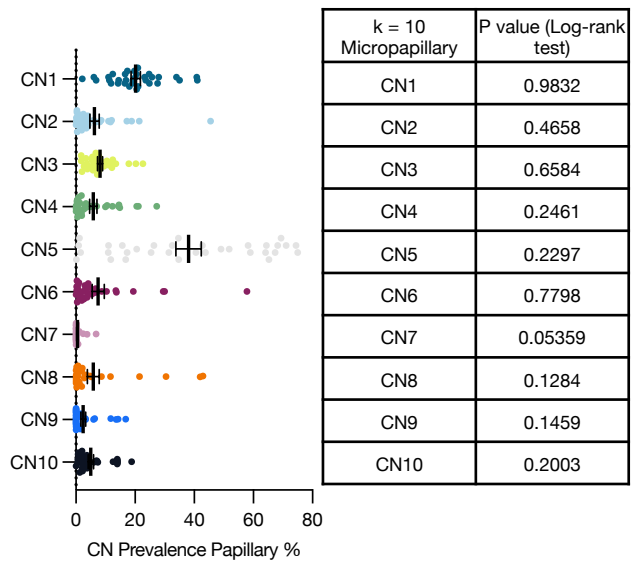

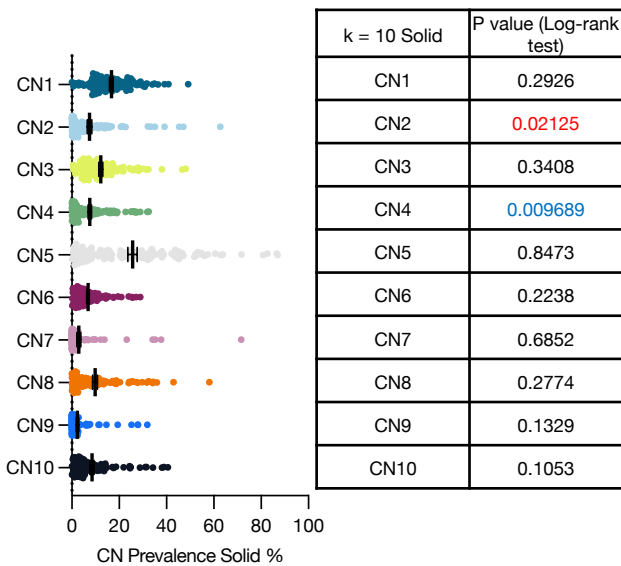

**Supplementary Fig. 2: Cellular neighbourhood prevalence across 5 major histological patterns in 416 lung adenocarcinoma patients.** Prevalence of 10 cellular neighbourhoods across the five histological subtypes (Lepidic n = 40, Papillary n = 33, Acinar n = 190, Micropapillary n = 35, Solid n = 118). Tables depict result of log-rank test for the overall survival based on low (z score <0) and high (z score  $\geq$ 0) prevalence of depicted neighbourhoods across histological subtypes. Black p values indicate no significant difference ( $p \geq 0.05$ ) in survival between the two groups. Blue p values indicate better survival ( $p < 0.05$ ) with high prevalence and red p values indicate better survival ( $p < 0.05$ ) with low prevalence of the depicted groups. Mean  $\pm$  SEM. Statistical analysis (log-rank test).

|                       | <b>Count</b> | <b>Percentage</b> |
|-----------------------|--------------|-------------------|
| <b>Sex</b>            |              |                   |
| Female                | 233          | 56.01%            |
| Male                  | 183          | 43.99%            |
| <b>Age</b>            |              |                   |
| <75                   | 369          | 88.70%            |
| ≥75                   | 47           | 11.30%            |
| <b>BMI</b>            |              |                   |
| <30                   | 346          | 83.17%            |
| ≥30                   | 70           | 16.83%            |
| <b>Smoking Status</b> |              |                   |
| Smoker                | 376          | 90.38%            |
| Non-smoker            | 38           | 9.13%             |
| NA                    | 2            | 0.48%             |
| <b>Pack Years</b>     |              |                   |
| 1-30                  | 89           | 21.39%            |
| ≥30                   | 256          | 61.54%            |
| NA                    | 71           | 17.07%            |
| <b>Stage</b>          |              |                   |
| I-II                  | 365          | 87.74%            |
| III-IV                | 50           | 12.02%            |
| NA                    | 1            | 0.24%             |
| <b>Progression</b>    |              |                   |
| Yes                   | 64           | 15.38%            |
| No                    | 340          | 81.73%            |
| NA                    | 12           | 2.88%             |
| <b>Survival</b>       |              |                   |
| <3 years              | 89           | 21.39%            |
| ≥3 years              | 318          | 76.44%            |
| NA                    | 9            | 2.16%             |
| <b>Histology</b>      |              |                   |
| Lepidic               | 40           | 9.62%             |
| Papillary             | 33           | 7.93%             |
| Acinar                | 190          | 45.67%            |
| Micropapillary        | 35           | 8.41%             |
| Solid                 | 118          | 28.37%            |

**Supplementary Table 1: Clinical characteristics of NSCLC cohort.**

| <b>Metal</b> | <b>Marker</b> | <b>Clone</b> | <b>Dilution</b> | <b>Catalog #</b> | <b>Supplier</b>                      |
|--------------|---------------|--------------|-----------------|------------------|--------------------------------------|
| 141Pr        | αSMA          | 1A4          | 1:100           | 3141017D         | Fluidigm                             |
| 142Nd        | CD16          | SP175        | 1:100           | ab183354         | Abcam                                |
| 143Nd        | Ki-67         | B56          | 1:100           | ab279657         | Abcam                                |
| 144Nd        | CD14          | SP192        | 1:100           | ab183322         | Abcam                                |
| 145Nd        | MPO           | EPR20257     | 1:100           | ab208670         | Abcam                                |
| 146Nd        | BCL2          | EPR17509     | 1:100           | 3146019D         | Fluidigm                             |
| 147Sm        | CD31          | EP3095       | 1:100           | ab216459         | Abcam                                |
| 148Nd        | TTF1          | SP141        | 1:100           | ab242428         | Abcam                                |
| 149Sm        | HIF1α         | EP1215Y      | 1:100           | ab51608          | Abcam                                |
| 150Nd        | PD-L1/Biotin  | E1L3N/1D4-C5 | 1:50/1:50       | 13684T/3150008B  | Cell Signaling Technologies/Fluidigm |
| 151Eu        | M-CSF-R       | SP211        | 1:100           | ab183316         | Abcam                                |
| 152Sm        | CD45          | D9M8I        | 1:100           | 3152018D         | Fluidigm                             |
| 153Eu        | CD117         | YR145        | 1:100           | ab32363          | Abcam                                |
| 154Sm        | CD11c         | EP1347Y      | 1:100           | ab52632          | Abcam                                |
| 155Gd        | FOXP3         | 236A/E7      | 1:50            | ab20034          | Abcam                                |
| 156Gd        | CD4           | EPR6855      | 1:100           | ab133616         | Abcam                                |
| 158Gd        | ARG1          | EPR6672(B)   | 1:100           | ab211961         | Abcam                                |
| 159Tb        | CD68          | KP1          | 1:50            | 3159035D         | Fluidigm                             |
| 160Gd        | MMP9          | EP1255Y      | 1:100           | ab137867         | Abcam                                |
| 161Dy        | CD20          | H1           | 1:100           | 3161029D         | Fluidigm                             |
| 162Dy        | CD8α          | C8/144B      | 1:50            | 3162034D         | Fluidigm                             |
| 163Dy        | pSTAT3        | EP2147Y      | 1:100           | ab76315          | Abcam                                |
| 164Dy        | CD163         | EPR19518     | 1:100           | ab213612         | Abcam                                |
| 165Ho        | PD1           | EPR4877(2)   | 1:50            | 3165039D         | Standard BioTools                    |
| 166Er        | B7-H4         | H74          | 1:100           | 3166030D         | Standard BioTools                    |
| 167Er        | CD39          | EPR20627     | 1:100           | ab223842         | Abcam                                |
| 168Er        | CD40          | EPR20540     | 1:50            | ab213205         | Abcam                                |
| 169Tm        | CD94          | EPR21003     | 1:100           | ab238166         | Abcam                                |
| 170Er        | CD3           | Polyclonal   | 1:50            | 3170019D         | Fluidigm                             |
| 171Yb        | pERK          | D13.14.4E    | 1:100           | 3171010A         | Fluidigm                             |
| 172Yb        | CC3           | 5A1E         | 1:100           | 3171021D         | Standard BioTools                    |
| 173Yb        | B7-H3         | 3173014D     | 1:100           | 3172027D         | Standard BioTools                    |
| 174Yb        | HLA-DR        | EPR3692      | 1:100           | ab92511          | Abcam                                |
| 175Lu        | PanCK         | AE1+AE3      | 1:100           | ab80826          | Abcam                                |
| 176Yb        | Histone H3    | DIH2         | 1:100           | 3176023D         | Fluidigm                             |

**Supplementary Table 2: Optimized antibody panel for imaging mass cytometry.**

| Histological comparison     | P value (Log-rank test) |
|-----------------------------|-------------------------|
| Lepidic vs Papillary        | 0.0078                  |
| Lepidic vs Acinar           | 0.0095                  |
| Lepidic vs Micropapillary   | 0.0143                  |
| Lepidic vs Solid            | 0.0002                  |
| Papillary vs Acinar         | 0.5761                  |
| Papillary vs Micropapillary | 0.9398                  |
| Papillary vs Solid          | 0.3289                  |
| Acinar vs Micropapillary    | 0.5446                  |
| Acinar vs Solid             | 0.0099                  |
| Micropapillary vs Solid     | 0.3856                  |

**Supplementary Table 3: Log-rank p-values comparing survival in five histological subtypes.** Colour of the p values indicates worse overall survival for the histological group of the same colour.



|                                    | Cancer | B Cell | Neutrophil | NK Cell | Dendritic Cell | Endothelial Cell | Mast Cell | T <sub>c</sub> | T <sub>H</sub> | T <sub>reg</sub> | T other | CD163- Mac | CD163+ Mac | CI Mo | Non-CI Mo | Int Mo   | Undefined |
|------------------------------------|--------|--------|------------|---------|----------------|------------------|-----------|----------------|----------------|------------------|---------|------------|------------|-------|-----------|----------|-----------|
| Female vs male                     | 0.342  | 0.181  | 0.527      | 0.880   | 0.378          | 0.888            | 0.148     | 0.932          | 0.006          | 0.087            | 0.646   | 0.855      | 0.965      | 0.702 | 0.924     | 0.993    | 0.679     |
| <75 y/o vs ≥75 y/o                 | 0.476  | 0.702  | 0.547      | 0.880   | 0.594          | 0.888            | 0.427     | 0.066          | 0.816          | 0.640            | 0.646   | 0.855      | 0.566      | 0.702 | 0.924     | 0.993    | 0.750     |
| BMI <30 vs BMI ≥30                 | 0.647  | 0.627  | 0.547      | 0.880   | 0.855          | 0.888            | 0.182     | 0.707          | 0.816          | 0.924            | 0.889   | 0.855      | 0.666      | 0.878 | 0.925     | 0.993    | 0.679     |
| Non-smoker vs smoker               | 0.476  | 0.725  | 0.527      | 0.880   | 0.378          | 0.945            | 0.005     | 0.066          | 0.452          | 0.087            | 0.722   | 0.855      | 0.431      | 0.702 | 0.925     | 0.245    | 0.821     |
| 1-30 PY vs ≥30 PY                  | 0.005  | 0.921  | 0.547      | 0.880   | 0.378          | 0.888            | 0.639     | 0.066          | 0.573          | 0.087            | 0.154   | 0.564      | 0.431      | 0.259 | 0.021     | 0.017    | 0.262     |
| Stage I-II vs Stage III-IV         | 0.938  | 0.181  | 8.24E-06   | 0.880   | 0.916          | 0.888            | 0.013     | 0.253          | 0.178          | 0.902            | 0.646   | 0.564      | 0.866      | 0.702 | 0.924     | 0.993    | 0.821     |
| No progression vs progression      | 0.521  | 0.686  | 0.547      | 0.880   | 0.855          | 0.888            | 0.939     | 0.570          | 0.452          | 0.132            | 0.978   | 0.855      | 0.566      | 0.878 | 0.558     | 0.993    | 0.821     |
| Low vs high expression (survival)* | 0.908  | 0.001  | 0.357      | 0.745   | 0.659          | 0.362            | 0.050     | 0.653          | 0.061          | 0.314            | 0.517   | 0.420      | 0.004      | 0.560 | 0.050     | 0.010    | 0.068     |
| Lepidic vs Papillary               | 1      | 1      | 0.996      | 0.222   | 0.992          | 1                | 0.940     | 0.848          | 0.855          | 0.909            | 1       | 0.758      | 0.371      | 0.114 | 1         | 0.983    | 1         |
| Lepidic vs Aciinar                 | 0.078  | 0.834  | 0.814      | 0.876   | 1              | 0.991            | 1         | 1              | 0.817          | 0.996            | 0.400   | 0.069      | 0.635      | 0.420 | 0.926     | 0.448    | 0.471     |
| Lepidic vs Micropapillary          | 0.945  | 0.993  | 0.988      | 0.818   | 0.991          | 0.986            | 0.066     | 0.999          | 0.999          | 1                | 0.574   | 0.411      | 0.989      | 0.139 | 0.921     | 0.423    | 0.998     |
| Lepidic vs Solid                   | 0.004  | 0.963  | 0.015      | 0.895   | 0.979          | 1                | 0.004     | 0.136          | 1              | 0.240            | 0.068   | 0.439      | 0.359      | 0.026 | 0.031     | 1.46E-06 | 0.995     |
| Papillary vs Aciinar               | 0.137  | 0.950  | 0.984      | 0.410   | 0.964          | 0.994            | 0.942     | 0.599          | 0.166          | 0.609            | 0.541   | 0.884      | 0.867      | 0.616 | 0.963     | 0.905    | 0.597     |
| Papillary vs Micropapillary        | 0.960  | 0.976  | 1          | 0.852   | 1              | 0.989            | 0.392     | 0.953          | 0.761          | 0.962            | 0.662   | 0.987      | 0.696      | 1     | 0.951     | 0.797    | 0.997     |
| Papillary vs Solid                 | 0.011  | 0.995  | 0.096      | 0.456   | 1              | 1                | 0.128     | 0.007          | 0.740          | 0.028            | 0.130   | 1          | 0.001      | 1     | 0.069     | 0.00019  | 0.998     |
| Aciinar vs Micropapillary          | 0.570  | 0.545  | 0.994      | 0.991   | 0.959          | 0.999            | 0.017     | 0.983          | 0.947          | 0.978            | 1       | 0.999      | 0.955      | 0.693 | 0.999     | 0.979    | 0.293     |
| Aciinar vs Solid                   | 0.439  | 0.986  | 0.009      | 1       | 0.820          | 0.962            | 3.30E-06  | 0.008          | 0.524          | 0.063            | 0.571   | 0.727      | 1.27E-05   | 0.235 | 0.008     | 9.64E-08 | 0.359     |
| Micropapillary vs Solid            | 0.103  | 0.780  | 0.114      | 0.993   | 1              | 0.972            | 1         | 0.080          | 0.999          | 0.194            | 0.954   | 0.989      | 0.142      | 1     | 0.396     | 0.023    | 0.945     |

**Supplementary Table 4: Comparison of cell frequencies between various clinical parameters.**

Colour of the p values indicates higher prevalence or improved survival\* for the clinical group of the same colour. FDR-corrected two-tailed Student t-test for sex, age, BMI, smoking status, pack-years, stage, progression status; one-way ANOVA with Tukey multiple comparison test for histological group; log-rank test for survival.

|                             | Hazard Ratio | 95% CI for Hazard Ratio |       | Significance (p value) |
|-----------------------------|--------------|-------------------------|-------|------------------------|
|                             |              | Lower                   | Upper |                        |
| pERK+ T <sub>H</sub>        | 0.949        | 0.914                   | 0.985 | 0.005                  |
| HIF1 $\alpha$ + neutrophils | 1.006        | 1.0001                  | 1.011 | 0.046                  |
| Ki-67+ endothelial cells    | 1.084        | 1.009                   | 1.163 | 0.027                  |

**Supplementary Table 5: Univariate Cox regression of the association between the prevalence of pERK+ T<sub>H</sub>, HIF-1 $\alpha$ + neutrophils and Ki-67+ endothelial cells and survival outcomes.**

|                                    | CN1      | CN2   | CN3   | CN4   | CN5   | CN6   | CN7      | CN8   | CN9   | CN10  |
|------------------------------------|----------|-------|-------|-------|-------|-------|----------|-------|-------|-------|
| Female vs male                     | 0.806    | 0.338 | 0.820 | 0.015 | 0.304 | 0.765 | 0.665    | 0.907 | 0.287 | 0.678 |
| <75 y/o vs ≥75 y/o                 | 0.816    | 0.806 | 0.585 | 0.960 | 0.304 | 0.987 | 0.665    | 0.302 | 0.908 | 0.496 |
| BMI <30 vs BMI ≥30                 | 0.316    | 0.338 | 0.219 | 0.960 | 0.913 | 0.987 | 0.834    | 0.907 | 0.287 | 0.496 |
| Non-smoker vs smoker               | 0.015    | 0.887 | 0.955 | 0.425 | 0.913 | 0.987 | 0.665    | 0.078 | 0.908 | 0.430 |
| 1-30 PY vs ≥30 PY                  | 0.720    | 0.187 | 0.463 | 0.425 | 0.004 | 0.765 | 0.897    | 0.078 | 0.908 | 0.496 |
| Stage I-II vs Stage III-IV         | 0.013    | 0.887 | 0.078 | 0.425 | 0.318 | 0.230 | 1.57E-06 | 0.907 | 0.287 | 0.874 |
| No progression vs progression      | 0.828    | 0.887 | 0.621 | 0.425 | 0.430 | 0.765 | 0.834    | 0.404 | 0.595 | 0.496 |
| Low vs high expression (survival)* | 0.375    | 0.006 | 0.026 | 0.039 | 0.888 | 0.473 | 0.100    | 0.797 | 0.001 | 0.893 |
| Lepidic vs Papillary               | 0.002    | 0.965 | 0.019 | 0.996 | 0.550 | 0.356 | 0.999    | 0.998 | 0.989 | 0.990 |
| Lepidic vs Acinar                  | 0.00032  | 0.194 | 0.333 | 0.616 | 0.757 | 0.136 | 0.934    | 0.984 | 0.751 | 0.359 |
| Lepidic vs Micropapillary          | 0.004    | 0.996 | 0.713 | 0.910 | 0.981 | 0.473 | 0.999    | 0.998 | 0.998 | 0.884 |
| Lepidic vs Solid                   | 2.19E-10 | 0.520 | 0.955 | 0.964 | 0.567 | 0.388 | 0.048    | 0.039 | 0.982 | 0.004 |
| Papillary vs Acinar                | 0.936    | 0.764 | 0.222 | 0.402 | 0.024 | 1     | 0.994    | 1     | 0.987 | 0.807 |
| Papillary vs Micropapillary        | 0.999    | 0.999 | 0.393 | 0.767 | 0.879 | 1     | 1        | 1     | 0.941 | 0.993 |
| Papillary vs Solid                 | 0.305    | 0.963 | 0.023 | 0.834 | 0.013 | 0.983 | 0.160    | 0.161 | 1     | 0.056 |
| Acinar vs Micropapillary           | 0.990    | 0.507 | 1     | 0.999 | 0.362 | 1     | 0.995    | 1     | 0.548 | 0.981 |
| Acinar vs Solid                    | 8.83E-05 | 0.938 | 0.448 | 0.824 | 0.980 | 0.958 | 0.016    | 0.003 | 0.886 | 0.046 |
| Micropapillary vs Solid            | 0.150    | 0.834 | 0.915 | 0.994 | 0.228 | 0.999 | 0.155    | 0.138 | 0.901 | 0.176 |

**Supplementary Table 6: Comparison of ten cellular neighbourhoods between various clinical parameters.** Colour of the p values indicates higher prevalence or improved survival\* for the clinical group of the same colour. FDR-corrected two-tailed Student t-test for sex, age, BMI, smoking status, pack-years, stage, progression status; one-way ANOVA with Tukey multiple comparison test for histological group; log-rank test for survival.

|                                    |       |          |          |       |       |       |       |       |          |       |       |       |       |       |          |       |       |       |       |         |       |       |         |       |       |       |       |          |       |       |
|------------------------------------|-------|----------|----------|-------|-------|-------|-------|-------|----------|-------|-------|-------|-------|-------|----------|-------|-------|-------|-------|---------|-------|-------|---------|-------|-------|-------|-------|----------|-------|-------|
|                                    | CN1   | CN2      | CN3      | CN4   | CN5   | CN6   | CN7   | CN8   | CN9      | CN10  | CN11  | CN12  | CN13  | CN14  | CN15     | CN16  | CN17  | CN18  | CN19  | CN20    | CN21  | CN22  | CN23    | CN24  | CN25  | CN26  | CN27  | CN28     | CN29  | CN30  |
| Female vs male                     | 0.167 | 0.646    | 0.854    | 0.407 | 0.625 | 0.955 | 0.262 | 0.999 | 0.608    | 0.222 | 0.337 | 0.637 | 0.945 | 0.841 | 0.487    | 0.017 | 0.880 | 0.905 | 0.767 | 0.456   | 0.052 | 0.347 | 0.964   | 0.894 | 0.434 | 0.796 | 0.411 | 0.553    | 0.081 | 0.410 |
| <75 y/o vs ≥75 y/o                 | 0.819 | 0.719    | 0.501    | 0.904 | 0.930 | 0.965 | 0.622 | 0.699 | 0.608    | 0.222 | 0.919 | 0.637 | 0.337 | 0.663 | 0.667    | 0.878 | 0.880 | 0.271 | 0.488 | 0.161   | 0.962 | 0.347 | 0.964   | 0.894 | 0.991 | 0.869 | 0.168 | 0.264    | 0.451 | 0.410 |
| BMI <30 vs BMI ≥30                 | 0.167 | 0.719    | 0.854    | 0.475 | 0.868 | 0.955 | 0.822 | 0.418 | 0.878    | 0.700 | 0.056 | 0.637 | 0.537 | 0.841 | 0.487    | 0.902 | 0.880 | 0.905 | 0.767 | 0.213   | 0.447 | 0.347 | 0.964   | 0.894 | 0.991 | 0.796 | 0.255 | 0.553    | 0.782 | 0.410 |
| Non-smoker vs 1-30 PY vs ≥30 PY    | 0.888 | 0.608    | 0.020    | 0.904 | 0.625 | 0.435 | 0.262 | 0.856 | 0.608    | 0.700 | 0.919 | 0.637 | 0.472 | 0.663 | 0.007    | 0.878 | 0.880 | 0.141 | 0.488 | 0.213   | 0.238 | 0.347 | 0.604   | 0.894 | 0.991 | 0.796 | 0.255 | 0.025    | 0.946 | 0.519 |
| Stage I/II vs Stage I/IV           | 0.167 | 0.209    | 0.466    | 0.407 | 0.614 | 0.965 | 0.262 | 0.803 | 0.894    | 0.002 | 0.919 | 0.637 | 0.537 | 0.663 | 0.487    | 0.047 | 0.880 | 0.145 | 0.488 | 0.053   | 0.984 | 0.347 | 0.173   | 0.894 | 0.991 | 0.796 | 0.181 | 0.953    | 0.451 | 0.410 |
| No progression vs progression      | 0.888 | 0.601    | 0.466    | 0.904 | 0.016 | 0.955 | 0.262 | 0.903 | 2.14E-06 | 0.222 | 0.337 | 0.897 | 0.793 | 0.663 | 0.003    | 0.878 | 0.880 | 0.782 | 0.779 | 0.053   | 0.563 | 0.988 | 0.964   | 0.894 | 0.434 | 0.975 | 0.168 | 0.264    | 0.081 | 0.410 |
| Low vs high expression (survival)* | 0.003 | 0.837    | 0.163    | 0.349 | 0.139 | 0.429 | 0.033 | 0.459 | 0.215    | 0.522 | 0.039 | 0.048 | 0.697 | 0.412 | 0.069    | 0.936 | 0.752 | 0.265 | 0.287 | 0.61    | 0.076 | 0.139 | 0.00042 | 0.888 | 0.003 | 0.281 | 0.805 | 0.350    | 0.031 | 0.142 |
| Leptic vs Papillary                | 0.946 | 0.984    | 0.339    | 0.982 | 0.416 | 0.977 | 0.997 | 0.879 | 0.999    | 0.178 | 0.970 | 0.133 | 0.943 | 0.512 | 0.007    | 0.966 | 1     | 0.997 | 0.898 | 0.284   | 0.992 | 0.999 | 0.993   | 0.069 | 0.994 | 0.613 | 0.141 | 0.246    | 0.043 | 0.991 |
| Leptic vs Acanth                   | 0.362 | 0.00048  | 0.001    | 0.598 | 0.009 | 0.043 | 0.930 | 0.939 | 0.934    | 0.991 | 0.761 | 0.116 | 0.591 | 0.994 | 0.023    | 0.539 | 0.703 | 0.921 | 1     | 0.628   | 0.625 | 0.509 | 0.050   | 0.864 | 0.754 | 0.777 | 0.548 | 0.038    | 0.531 | 0.997 |
| Leptic vs Micropapillary           | 1     | 0.457    | 0.097    | 0.771 | 0.227 | 0.881 | 0.938 | 0.988 | 0.999    | 0.861 | 1     | 0.626 | 0.866 | 0.394 | 0.024    | 0.436 | 0.566 | 0.997 | 0.999 | 0.751   | 0.997 | 0.585 | 0.638   | 0.413 | 1     | 0.900 | 0.591 | 0.023    | 0.418 | 0.263 |
| Leptic vs Solid                    | 0.442 | 9.99E-06 | 4.18E-06 | 0.738 | 0.015 | 0.067 | 0.438 | 0.896 | 0.054    | 1     | 0.999 | 1     | 0.014 | 0.037 | 1.27E-06 | 0.302 | 0.830 | 0.008 | 0.995 | 0.624   | 1     | 0.002 | 0.106   | 0.294 | 0.982 | 0.998 | 1     | 5.77E-08 | 0.040 | 0.979 |
| Papillary vs Acanth                | 0.943 | 0.027    | 0.667    | 0.257 | 0.887 | 0.350 | 0.917 | 0.484 | 0.995    | 0.014 | 0.999 | 0.955 | 0.935 | 0.505 | 0.607    | 0.170 | 0.867 | 0.998 | 0.859 | 0.744   | 0.944 | 0.769 | 0.271   | 0.129 | 0.975 | 0.954 | 0.573 | 0.998    | 0.239 | 0.999 |
| Papillary vs Micropapillary        | 0.984 | 0.880    | 0.980    | 0.467 | 0.998 | 0.998 | 0.994 | 0.636 | 1        | 0.792 | 0.945 | 0.884 | 0.999 | 1     | 0.994    | 0.163 | 0.987 | 1     | 0.964 | 0.93    | 1     | 0.767 | 0.884   | 0.903 | 0.980 | 0.984 | 0.913 | 0.816    | 0.825 | 0.581 |
| Papillary vs Solid                 | 0.960 | 0.001    | 0.082    | 0.377 | 0.911 | 0.409 | 0.329 | 0.998 | 0.180    | 0.062 | 0.982 | 0.027 | 0.249 | 0.941 | 0.875    | 0.077 | 0.937 | 0.060 | 0.607 | 0.002   | 0.980 | 0.014 | 0.397   | 0.681 | 1     | 0.630 | 0.027 | 0.009    | 0.952 | 0.816 |
| Acanth vs Micropapillary           | 0.581 | 0.385    | 0.975    | 1     | 0.967 | 0.590 | 0.617 | 1     | 0.895    | 0.449 | 0.714 | 0.896 | 0.850 | 0.355 | 0.888    | 0.980 | 0.897 | 0.998 | 1     | 1       | 0.889 | 0.897 | 0.916   | 0.718 | 0.651 | 1     | 0.985 | 0.803    | 0.854 | 0.180 |
| Acanth vs Solid                    | 1     | 0.457    | 0.198    | 0.999 | 1     | 1     | 0.373 | 0.215 | 0.020    | 0.967 | 0.658 | 0.001 | 0.944 | 0.001 | 0.001    | 0.948 | 0.999 | 0.001 | 0.927 | 0.00023 | 0.196 | 0.006 | 0.999   | 0.508 | 0.991 | 0.748 | 0.078 | 6.01E-06 | 0.219 | 0.625 |
| Micropapillary vs Solid            | 0.650 | 0.053    | 0.318    | 0.999 | 0.989 | 0.647 | 0.104 | 0.596 | 0.169    | 0.746 | 0.985 | 0.344 | 0.119 | 0.977 | 0.653    | 1     | 1     | 0.047 | 0.970 | 0.045   | 0.991 | 0.393 | 0.965   | 0.899 | 0.945 | 0.941 | 0.297 | 0.254    | 0.874 | 0.027 |

### Supplementary Table 7: Comparison of 30 cellular neighbourhoods between various clinical parameters.

Colour of the p values indicates higher prevalence or improved survival\* for the clinical group of the same colour. FDR-corrected two-tailed Student t-test for sex, age, BMI, smoking status, pack-years, stage, progression status; one-way ANOVA with Tukey multiple comparison test for histological group; log-rank test for survival

|                   | Baseline | Our Score<br>5-Fold Cross Validation |         |         |         |         | Mean   | Standard<br>Deviation |
|-------------------|----------|--------------------------------------|---------|---------|---------|---------|--------|-----------------------|
|                   |          | Fold #1                              | Fold #2 | Fold #3 | Fold #4 | Fold #5 |        |                       |
| Histological Type | 45.67%   | 43.33%                               | 49.12%  | 50.00%  | 50.00%  | 42.59%  | 47.01% | 3.72%                 |
| Sex - Male/Female | 56.00%   | 60.24%                               | 44.57%  | 54.21%  | 54.21%  | 50.60%  | 52.77% | 5.74%                 |
| Survival 3 Years  | 76.44%   | 74.66%                               | 70.00%  | 78.12%  | 81.81%  | 75.75%  | 76.07% | 4.36%                 |
| BMI $\geq$ 30     | 83.17%   | 82.89%                               | 94.36%  | 88.73%  | 89.55%  | 85.93%  | 88.29% | 4.28%                 |
| Progression       | 84.15%   | 86.76%                               | 93.33%  | 87.67%  | 85.07%  | 86.15%  | 87.80% | 3.23%                 |
| Stage 1-2 vs 3-4  | 87.95%   | 90.90%                               | 87.95%  | 97.46%  | 92.85%  | 91.17%  | 92.07% | 3.49%                 |
| Age $\geq$ 75     | 88.70%   | 92.64%                               | 93.67%  | 96.00%  | 95.77%  | 94.66%  | 94.55% | 1.42%                 |
| Smoking           | 90.82%   | 88.31%                               | 96.10%  | 91.55%  | 91.03%  | 97.26%  | 92.85% | 3.73%                 |

**Supplementary Table 8: Prediction scores for a discovery cohort consisting of 416 NSCLC patients (416 cores) using cell frequencies.**

|                   | Baseline | Our Score<br>5-Fold Cross Validation |         |         |         |         | Mean   | Standard<br>Deviation |
|-------------------|----------|--------------------------------------|---------|---------|---------|---------|--------|-----------------------|
|                   |          | Fold #1                              | Fold #2 | Fold #3 | Fold #4 | Fold #5 |        |                       |
| Histological Type | 45.67%   | 64.17%                               | 70.83%  | 59.25%  | 70.90%  | 60.78%  | 65.19% | 5.48%                 |
| Sex - Male/Female | 56.00%   | 45.23%                               | 56.62%  | 39.75%  | 60.24%  | 60.24%  | 52.41% | 9.38%                 |
| Survival 3 Years  | 76.44%   | 81.57%                               | 91.93%  | 81.42%  | 92.18%  | 95.45%  | 88.51% | 6.55%                 |
| BMI $\geq$ 30     | 83.17%   | 98.68%                               | 94.36%  | 95.71%  | 98.48%  | 98.43%  | 97.13% | 1.98%                 |
| Progression       | 84.15%   | 92.75%                               | 98.64%  | 94.44%  | 100%    | 100%    | 97.17% | 3.36%                 |
| Stage 1-2 vs 3-4  | 87.95%   | 100%                                 | 100%    | 96.00%  | 93.24%  | 100%    | 97.85% | 3.10%                 |
| Age $\geq$ 75     | 88.70%   | 100%                                 | 100%    | 98.66%  | 100%    | 98.86%  | 99.50% | 0.683%                |
| Smoking           | 90.82%   | 100%                                 | 98.70%  | 100%    | 97.40%  | 98.63%  | 98.95% | 1.09%                 |

**Supplementary Table 9: Prediction scores for a discovery cohort consisting of 416 NSCLC patients (416 cores) using raw images of lineage markers.**

|                   | Baseline | Our Score<br>5-Fold Cross Validation |         |         |         |         | Mean   | Standard<br>Deviation |
|-------------------|----------|--------------------------------------|---------|---------|---------|---------|--------|-----------------------|
|                   |          | Fold #1                              | Fold #2 | Fold #3 | Fold #4 | Fold #5 |        |                       |
| Histological Type | 45.67%   | 55.22%                               | 75.00%  | 68.51%  | 65.45%  | 58.82%  | 64.60% | 7.84%                 |
| Sex - Male/Female | 56.00%   | 41.66%                               | 60.24%  | 46.98%  | 53.01%  | 50.60%  | 50.50% | 6.92%                 |
| Survival 3 Years  | 76.44%   | 86.84%                               | 87.09%  | 80.00%  | 81.25%  | 90.90%  | 85.22% | 4.51%                 |
| BMI $\geq$ 30     | 83.17%   | 100%                                 | 94.36%  | 94.28%  | 98.48%  | 95.31%  | 96.49% | 2.60%                 |
| Progression       | 84.15%   | 96.29%                               | 95.35%  | 96.66%  | 92.75%  | 98.64%  | 95.94% | 2.15%                 |
| Stage 1-2 vs 3-4  | 87.95%   | 100%                                 | 98.68%  | 98.66%  | 91.89%  | 98.55%  | 97.56% | 3.22%                 |
| Age $\geq$ 75     | 88.70%   | 98.41%                               | 97.53%  | 100%    | 100%    | 98.68%  | 98.92% | 1.07%                 |
| Smoking           | 90.82%   | 100%                                 | 98.70%  | 100%    | 97.40%  | 98.63%  | 98.95% | 1.09%                 |

**Supplementary Table 10: Prediction scores for a discovery cohort consisting of 416 NSCLC patients (416 cores) using raw images of all markers.**

|                    | Baseline | Our Score<br>5-Fold Cross Validation |         |         |         |         | Mean   | Standard<br>Deviation |
|--------------------|----------|--------------------------------------|---------|---------|---------|---------|--------|-----------------------|
|                    |          | Fold #1                              | Fold #2 | Fold #3 | Fold #4 | Fold #5 |        |                       |
| Clinical variables | 85.87%   | 77.19%                               | 84.21%  | 84.21%  | 76.79%  | 80.36%  | 80.55% | 3.61%                 |
| Cell frequencies   | 85.31%   | 92.85%                               | 92.15%  | 90.69%  | 86.00%  | 79.54%  | 88.25% | 5.55%                 |
| Lineage markers    | 85.31%   | 92.85%                               | 96.07%  | 93.02%  | 100%    | 97.72%  | 95.93% | 3.07%                 |
| All markers        | 85.31%   | 96.42%                               | 94.11%  | 93.02%  | 100%    | 93.18%  | 95.35% | 2.93%                 |

**Supplementary Table 11: Prediction scores for progression in a discovery cohort consisting of 286 Stage IA-IB <4cm patients (286 cores).**



|                       | <b>Count</b> | <b>Percentage</b> |
|-----------------------|--------------|-------------------|
| <b>Sex</b>            |              |                   |
| Female                | 36           | 60.00%            |
| Male                  | 24           | 40.00%            |
| <b>Age</b>            |              |                   |
| <75                   | 49           | 81.67%            |
| ≥75                   | 11           | 18.33%            |
| <b>Smoking Status</b> |              |                   |
| Smoker                | 53           | 88.33%            |
| Non-smoker            | 7            | 11.67%            |
| <b>Pack Years</b>     |              |                   |
| 1-30                  | 13           | 21.67%            |
| ≥30                   | 38           | 63.33%            |
| NA                    | 9            | 15.00%            |
| <b>Stage</b>          |              |                   |
| I                     | 60           | 100.00%           |
| <b>Progression</b>    |              |                   |
| Yes                   | 15           | 25.00%            |
| No                    | 45           | 75.00%            |
| NA                    | 0            | 0%                |
| <b>Histology</b>      |              |                   |
| Lepidic               | 13           | 21.67%            |
| Papillary             | 3            | 5.00%             |
| Acinar                | 34           | 56.67%            |
| Micropapillary        | 0            | 0%                |
| Solid                 | 8            | 13.33%            |
| NA                    | 2            | 3.33%             |

**Supplementary Table 12: Clinical characteristics of a validation cohort consisting of 60 Stage IA-IB <4cm patients (120 cores).**

|                  | <b>Baseline</b> | <b>Accuracy</b> | <b>Precision</b> | <b>Recall</b> | <b>Sensitivity</b> | <b>Specificity</b> |
|------------------|-----------------|-----------------|------------------|---------------|--------------------|--------------------|
| Cell frequencies | 75.00%          | 74.17%          | 75.65%           | 96.67%        | 96.67%             | 6.67%              |
| Lineage markers  | 75.00%          | 94.17%          | 95.60%           | 96.67%        | 96.67%             | 86.67%             |
| All markers      | 75.00%          | 93.33%          | 95.56%           | 95.56%        | 95.56%             | 86.67%             |

**Supplementary Table 13: Prediction scores and error measures for progression in a validation cohort consisting of 60 Stage IA-IB <4cm patients (120 cores).**

|            | Baseline | Our Score<br>5-Fold Cross Validation |         |         |         |         | Mean   | Standard<br>Deviation |
|------------|----------|--------------------------------------|---------|---------|---------|---------|--------|-----------------------|
|            |          | Fold #1                              | Fold #2 | Fold #3 | Fold #4 | Fold #5 |        |                       |
| CD20       | 85.31%   | 85.71%                               | 96.08%  | 88.37%  | 96.00%  | 93.18%  | 91.87% | 3.80%                 |
| CD68       | 85.31%   | 87.76%                               | 88.78%  | 89.80%  | 88.66%  | 89.69%  | 88.94% | 0.68%                 |
| αSMA       | 85.31%   | 84.69%                               | 81.63%  | 87.76%  | 90.72%  | 91.75%  | 87.31% | 3.43%                 |
| CD14       | 85.31%   | 84.69%                               | 85.71%  | 89.80%  | 89.69%  | 84.54%  | 86.89% | 2.16%                 |
| CD8α       | 85.31%   | 83.67%                               | 82.65%  | 90.82%  | 88.66%  | 86.60%  | 86.48% | 2.77%                 |
| MMP9       | 85.31%   | 83.67%                               | 82.65%  | 82.65%  | 91.75%  | 88.66%  | 85.88% | 3.36%                 |
| PanCK      | 85.31%   | 85.71%                               | 86.73%  | 81.63%  | 87.63%  | 87.63%  | 85.87% | 2.04%                 |
| pERK       | 85.31%   | 85.71%                               | 87.76%  | 87.76%  | 78.35%  | 88.66%  | 85.65% | 3.45%                 |
| CD45       | 85.31%   | 81.63%                               | 81.63%  | 87.76%  | 81.44%  | 90.72%  | 84.64% | 3.54%                 |
| HLA-DR     | 85.31%   | 81.63%                               | 81.63%  | 87.76%  | 83.51%  | 88.66%  | 84.64% | 2.75%                 |
| CD3        | 85.31%   | 82.65%                               | 82.65%  | 85.71%  | 84.54%  | 84.54%  | 84.02% | 1.09%                 |
| pSTAT3     | 85.31%   | 85.71%                               | 87.76%  | 84.69%  | 78.35%  | 82.47%  | 83.80% | 2.93%                 |
| CD31       | 85.31%   | 81.63%                               | 90.82%  | 88.78%  | 81.44%  | 76.29%  | 83.79% | 4.84%                 |
| CD163      | 85.31%   | 82.65%                               | 87.76%  | 80.61%  | 78.35%  | 87.63%  | 83.40% | 3.43%                 |
| ARG1       | 85.31%   | 78.57%                               | 85.71%  | 81.63%  | 85.57%  | 83.51%  | 83.00% | 2.44%                 |
| CD11c      | 85.31%   | 76.53%                               | 81.63%  | 87.76%  | 85.57%  | 81.44%  | 82.59% | 3.52%                 |
| CD40       | 85.31%   | 78.57%                               | 84.69%  | 89.80%  | 85.57%  | 74.23%  | 82.57% | 5.02%                 |
| CD94       | 85.31%   | 85.71%                               | 84.69%  | 81.63%  | 80.41%  | 79.38%  | 82.37% | 2.23%                 |
| TTF1       | 85.31%   | 78.57%                               | 77.55%  | 84.69%  | 85.57%  | 84.54%  | 82.18% | 3.10%                 |
| CC3        | 85.31%   | 82.65%                               | 88.78%  | 82.65%  | 77.32%  | 78.35%  | 81.95% | 3.70%                 |
| CD4        | 85.31%   | 74.49%                               | 83.67%  | 83.67%  | 80.41%  | 86.60%  | 81.77% | 3.77%                 |
| CD16       | 85.31%   | 79.59%                               | 80.61%  | 83.67%  | 81.44%  | 83.51%  | 81.77% | 1.46%                 |
| HIF1α      | 85.31%   | 76.53%                               | 83.67%  | 80.61%  | 83.51%  | 83.51%  | 81.57% | 2.52%                 |
| BCL2       | 85.31%   | 80.61%                               | 81.63%  | 84.69%  | 82.47%  | 76.29%  | 81.14% | 2.53%                 |
| Histone H3 | 85.31%   | 79.59%                               | 73.47%  | 86.73%  | 79.38%  | 81.44%  | 80.12% | 3.89%                 |
| CD39       | 85.31%   | 76.53%                               | 72.45%  | 83.67%  | 88.66%  | 78.35%  | 79.93% | 5.17%                 |
| FOXP3      | 85.31%   | 79.59%                               | 73.47%  | 82.65%  | 80.41%  | 80.41%  | 79.31% | 2.82%                 |
| CD117      | 85.31%   | 77.55%                               | 79.59%  | 78.57%  | 76.29%  | 79.38%  | 78.28% | 1.12%                 |
| MPO        | 85.31%   | 74.49%                               | 74.49%  | 73.47%  | 77.32%  | 80.41%  | 76.04% | 2.32%                 |
| Ki-67      | 85.31%   | 75.51%                               | 71.43%  | 79.59%  | 72.16%  | 79.38%  | 75.62% | 3.15%                 |
| B7-H4      | 85.31%   | 72.45%                               | 81.63%  | 76.53%  | 75.26%  | 71.13%  | 75.40% | 3.34%                 |

**Supplementary Table 14: Prediction scores for progression in a discovery cohort of 286 Stage IA-IB <4cm patients (286 cores) using individual markers.**

| Description | Marker combination                     | Baseline | Accuracy | Precision | Recall |
|-------------|----------------------------------------|----------|----------|-----------|--------|
| Top 2       | CD20, CD68                             | 75.00%   | 81.67%   | 85.56%    | 89.53% |
| Top 3       | CD20, CD68, αSMA                       | 75.00%   | 83.33%   | 85.56%    | 91.67% |
| Top 4       | CD20, CD68, αSMA, CD14                 | 75.00%   | 84.17%   | 88.89%    | 89.89% |
| Top 5       | CD20, CD68, αSMA, CD14, CD8α           | 75.00%   | 85.83%   | 92.22%    | 89.25% |
| CN25        | CD4, CD20                              | 75.00%   | 85.00%   | 88.89%    | 90.91% |
| CN29        | CD4, FOXP3                             | 75.00%   | 85.00%   | 88.89%    | 90.91% |
| CN21        | CD20, CD4, CD8, FOXP3                  | 75.00%   | 85.83%   | 90.00%    | 91.01% |
| CN12        | CD68, CD163, HLA-DR, CD11c, CD14, CD16 | 75.00%   | 89.17%   | 92.22%    | 93.26% |
| CN23        | αSMA, CD117, CD94, CD16, CD14          | 75.00%   | 90.83%   | 93.33%    | 94.38% |
| CN23 + CD20 | αSMA, CD117, CD94, CD16, CD14, CD20    | 75.00%   | 93.33%   | 95.55%    | 95.55% |

**Supplementary Table 15: Prediction scores and error measures for progression in a validation cohort consisting of 60 Stage IA-IB <4cm patients (120 cores) using marker combinations as indicated.**
